# Supplementary material for: Oral glucocorticoid therapy and all-cause and cause-specific mortality in patients with rheumatoid arthritis: a retrospective cohort study
Source: PubMed Central journal article supplement (PMC5065607; doi:10.1007/s10654-016-0167-1), 2016-06-02
Supplement: 10654_2016_167_MOESM1_ESM.pdf [file 10654_2016_167_MOESM1_ESM.pdf]

## Online supplements

### A1. Algorithm for definition of GC dose and duration

- Prescription duration was identified using the following approaches:
  - (1) Number of days the prescription was for;
  - (2) If this was not available, calculating the number of days by dividing the total amount of oral GC prescribed by the number per day for that period,
  - (3) If total amount of GC prescribed or number per day was missing, the mean duration for subsequent prescriptions for that patient (if there was a subsequent GC prescription for the patient) was used, or
  - (4) The mean prescription duration for all individuals using the same drug (if there was no subsequent GC prescription for the patient).
- If there was an overlap between two prescriptions, it was assumed the patients started the new prescription after finishing their first prescription. The maximum period of current exposure was set at one year for continuous prescription of oral GC.
- The daily dose of oral GC was calculated by multiplying the number of tablets prescribed per day by the strength of that particular oral GC.

**Figure A1. Removing 6 months period before death for checking the impact of perimortal bias**

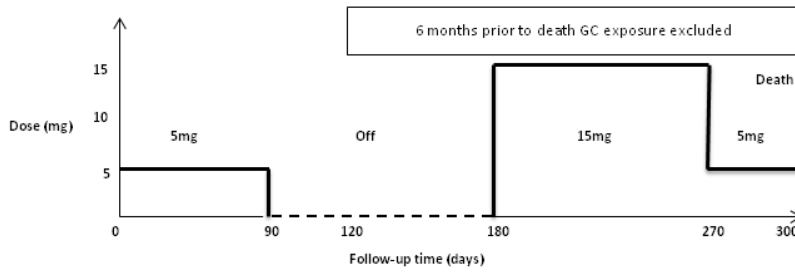

| GC exposure type                            | 0-90 days | 90-120 days | 120-300 days<br>(GC exposure for 6 months prior death was excluded and the last exposure status from 6 months earlier was carried forward) |
|---------------------------------------------|-----------|-------------|--------------------------------------------------------------------------------------------------------------------------------------------|
| Ever GC status                              | Yes       | Yes         | yes                                                                                                                                        |
| Current status                              | Yes       | No          | No                                                                                                                                         |
| Current GC dose (mg)                        | 5         | 0           | 0                                                                                                                                          |
| Current dose, category (mg)                 | 5-7.4     | 0           | 0                                                                                                                                          |
| Cumulative dose at end of each episode (mg) | 450       | 450         | 450                                                                                                                                        |
| Cumulative dose category (mg)               | 0-959.9   | 0-959.9     | 0-959.9                                                                                                                                    |

**Table A1. Association between oral GC use and mortality overall and by cause-specific with additional adjustment (N=11523).**

| Model | Oral GC pattern                                 | Adjusted hazard ratio (aHR) with 95% CI * |                           |                        |                                   |                           |
|-------|-------------------------------------------------|-------------------------------------------|---------------------------|------------------------|-----------------------------------|---------------------------|
|       |                                                 | All-cause mortality<br>death=1357         | CV mortality<br>death=483 | Neoplasms<br>death=639 | Respiratory diseases<br>death=243 | Other causes<br>death=320 |
| 1     | Ever use, (ref=never use)                       | 2.26 (1.98-2.58)                          | 2.00 (1.61-2.48)          | 3.62 (2.73-4.81)       | 2.90 (2.07-4.07)                  | 1.50 (1.15-1.95)          |
| 2     | Current use, (ref=non-use)                      | 1.83 (1.62-2.06)                          | 1.69 (1.38-2.06)          | 2.20 (1.71-2.84)       | 1.84 (1.40-2.43)                  | 1.76 (1.38-2.24)          |
| 3     | Current dose per 5mg /day                       | 1.35 (1.32-1.38)                          | 1.23 (1.15-1.31)          | 1.47 (1.42-1.52)       | 1.35 (1.28-1.43)                  | 1.29 (1.22-1.36)          |
| 4     | Current dose category, (ref=non-use)            |                                           |                           |                        |                                   |                           |
|       | >0-4.9mg                                        | 0.95 (0.76-1.20)                          | 1.09 (0.77-1.56)          | 0.45 (0.21-0.97)       | 0.73 (0.40-1.32)                  | 1.23 (0.82-1.85)          |
|       | 5.0-7.4mg                                       | 1.53 (1.29-1.83)                          | 1.80 (1.37-2.35)          | 1.07 (0.67-1.71)       | 1.84 (1.27-2.68)                  | 1.22 (0.83-1.78)          |
|       | 7.5-14.9mg                                      | 2.26 (1.90-2.68)                          | 2.05 (1.53-2.75)          | 2.29 (1.55-3.40)       | 1.94 (1.28-2.94)                  | 2.77 (2.01-3.83)          |
|       | 15.0-24.9mg                                     | 5.74 (4.30-7.66)                          | 2.68 (1.37-5.24)          | 12.4 (7.77-19.7)       | 9.10 (5.26-15.7)                  | 2.78 (1.22-6.33)          |
|       | ≥25mg                                           | 11.6 (8.70-15.5)                          | 3.16 (1.30-7.68)          | 35.3 (23.7-52.5)       | 8.94 (4.14-19.3)                  | 7.54 (3.68-15.4)          |
| 5     | Cumulative dose since cohort entry (1000mg/day) | 1.06 (1.05-1.07)                          | 1.05 (1.03-1.07)          | 1.06 (1.04-1.08)       | 1.07 (1.05-1.09)                  | 1.06 (1.04-1.08)          |
| 6     | Cumulative dose category (ref=non-use)          |                                           |                           |                        |                                   |                           |
|       | >0-959.9mg                                      | 1.80 (1.50-2.16)                          | 1.78 (1.33-2.39)          | 2.66 (1.84-3.85)       | 2.17 (1.36-3.45)                  | 1.11 (0.74-1.66)          |
|       | 960-3054.9mg                                    | 2.08 (1.73-2.49)                          | 1.63 (1.19-2.22)          | 4.22 (2.98-5.98)       | 2.37 (1.50-3.75)                  | 1.29 (0.88-1.90)          |
|       | 3055-7299.9mg                                   | 2.28 (1.91-2.72)                          | 2.08 (1.55-2.80)          | 3.84 (2.65-5.55)       | 2.75 (1.78-4.26)                  | 1.47 (1.01-2.12)          |
|       | ≥7300mg                                         | 3.39 (2.86-4.03)                          | 2.91 (2.18-3.87)          | 4.64 (3.17-6.77)       | 5.17 (3.44-7.78)                  | 2.39 (1.70-3.35)          |

\* Adjusted for gender, age, smoking status, SES, prior cumulative dose of GC, Charlson comorbidity index at baseline, time-varying NSAID use, time-varying DMARD use, mean number of rheumatology visits per year and mean number of GC visits per year.

**Table A2. Mortality rate by cause of death following GC therapy initiation in ever GC users**

|                     | Within the six months | Time period after the first six months |
|---------------------|-----------------------|----------------------------------------|
| <b>All-cause</b>    |                       |                                        |
| Events              | 228                   | 1,734                                  |
| Time at risk (pyrs) | 4,039                 | 40,499                                 |
| Rate per 1000pyrs   | 56.5 (49.6-64.3)      | 42.8 (40.8-44.9)                       |
| <b>CV</b>           |                       |                                        |
| Events              | 58                    | 645                                    |
| Time at risk (pyrs) | 4,039                 | 40,499                                 |
| Rate per 1000pyrs   | 14.4 (11.1-18.6)      | 15.9 (14.7-17.2)                       |
| <b>Neoplasm</b>     |                       |                                        |
| Events              | 95                    | 355                                    |
| Time at risk (pyrs) | 4,039                 | 40,499                                 |
| Rate per 1000pyrs   | 23.5 (19.2-28.7)      | 8.72 (7.85-9.67)                       |
| <b>Respiratory</b>  |                       |                                        |
| Events              | 32                    | 345                                    |
| Time at risk (pyrs) | 4,039                 | 40,499                                 |
| Rate per 1000pyrs   | 7.92 (5.60-11.2)      | 8.52 (7.67-9.47)                       |
| <b>Others</b>       |                       |                                        |
| Events              | 43                    | 391                                    |
| Time at risk (pyrs) | 4,039                 | 40,499                                 |
| Rate per 1000pyrs   | 10.6 (7.89-14.4)      | 9.65 (8.74-10.7)                       |

**Table A3. The proportion of cause of death by GC use status**

|             | Never GC use<br>N (%) | GC used in < 6<br>months before death<br>N (%) | GC used in ≥ 6<br>months before death<br>N (%) | Total        |                                              |
|-------------|-----------------------|------------------------------------------------|------------------------------------------------|--------------|----------------------------------------------|
| CV          | 428 (41.4)            | 540 (34.2)                                     | 163 (42.2)                                     | 1,131 (37.8) |                                              |
| Neoplasm    | 191 (18.5)            | 368 (23.4)                                     | 80 (20.7)                                      | 639 (21.3)   |                                              |
| Respiratory | 132 (12.8)            | 313 (19.9)                                     | 64 (16.6)                                      | 509 (17.0)   |                                              |
| Others      | 283 (27.4)            | 355 (22.5)                                     | 79 (20.5)                                      | 717 (23.9)   |                                              |
| Total       | 1,034 (100)           | 1,576 (100)                                    | 386 (100)                                      | 2,996        | Pearson<br>chi2(6)=44.7<br>p- value (<0.001) |

**Table A4. Association between selected oral GC models and all-cause mortality and cause-specific mortality after removal of GC information for the 6 months prior to death**

| Adjusted hazard ratio (aHR) with 95% CI *               |                            |                   |                         |                            |                       |
|---------------------------------------------------------|----------------------------|-------------------|-------------------------|----------------------------|-----------------------|
| Oral GC pattern                                         | All-cause<br>(death=2,666) | CV<br>(death=990) | Neoplasm<br>(death=589) | Respiratory<br>(death=453) | Others<br>(death=634) |
| Ever use, (ref=never use)                               | 1.64 (1.50-1.79)           | 1.57 (1.36-1.81)  | 1.76 (1.47-2.10)        | 2.37 (1.90-2.97)           | 1.25 (1.04-1.50)      |
| GC use in 6 months prior death, (ref=non-use)           | 1.82 (1.66-1.99)           | 1.54 (1.32-1.78)  | 1.98 (1.63-2.40)        | 2.03 (1.65-2.50)           | 2.00 (1.67-2.39)      |
| GC dose in 6 months prior death (5mg /day)              | 1.30 (1.26-1.33)           | 1.23 (1.17-1.29)  | 1.32 (1.25-1.40)        | 1.35 (1.28-1.43)           | 1.33 (1.26-1.40)      |
| GC dose category in 6 months prior death, (ref=non-use) |                            |                   |                         |                            |                       |
| >0-4.9mg                                                | 1.32 (1.14-1.53)           | 1.12 (0.87-1.44)  | 1.56 (1.14-2.15)        | 1.22 (0.85-1.77)           | 1.51 (1.13-2.02)      |
| 5.0-7.4mg                                               | 1.52 (1.34-1.74)           | 1.40 (1.13-1.73)  | 1.74 (1.30-2.31)        | 1.64 (1.21-2.22)           | 1.46 (1.11-1.92)      |
| 7.5-14.9mg                                              | 2.56 (2.26-2.89)           | 2.09 (1.69-2.58)  | 2.37 (1.78-3.18)        | 2.99 (2.26-3.96)           | 3.18 (2.51-4.03)      |
| 15.0-24.9mg                                             | 3.68 (2.85-4.75)           | 3.34 (2.19-5.08)  | 3.42 (1.87-6.28)        | 5.12 (3.02-8.68)           | 3.20 (1.81-5.64)      |
| ≥25mg                                                   | 4.15 (2.84-6.08)           | 1.15 (0.37-3.59)  | 5.66 (2.80-11.4)        | 8.28 (4.23-16.2)           | 4.93 (2.33-10.5)      |
| Cumulative dose since cohort entry (1000mg/day)         | 1.06 (1.05-1.07)           | 1.05 (1.04-1.07)  | 1.05 (1.03-1.07)        | 1.07 (1.05-1.09)           | 1.07 (1.05-1.08)      |
| Cumulative dose category (ref=non-use)                  |                            |                   |                         |                            |                       |
| >0-959.9mg                                              | 1.32 (1.17-1.50)           | 1.26 (1.02-1.55)  | 1.52 (1.19-1.94)        | 1.90 (1.40-2.58)           | 0.94 (0.72-1.24)      |
| 960-3054.9mg                                            | 1.55 (1.37-1.76)           | 1.47 (1.20-1.81)  | 1.75 (1.35-2.27)        | 2.41 (1.80-3.23)           | 1.05 (0.79-1.38)      |
| 3055-7298.9mg                                           | 1.73 (1.53-1.97)           | 1.78 (1.45-2.18)  | 1.92 (1.47-2.51)        | 2.11 (1.53-2.91)           | 1.33 (1.02-1.74)      |
| ≥7299mg                                                 | 2.59 (2.28-2.95)           | 2.33 (1.87-2.89)  | 2.31 (1.73-3.08)        | 4.22 (3.10-5.75)           | 2.30 (1.78-2.97)      |

\* Adjusted for gender, age, smoking status, SES, prior cumulative dose of GC, Charlson comorbidity index at baseline, time-varying NSAID use and time-varying DMARD use
